# Supplementary material for: Clinical Evaluation of BD Veritor SARS-CoV-2 Point-of-Care Test Performance Compared to PCR-Based Testing and versus the Sofia 2 SARS Antigen Point-of-Care Test
Source: PubMed Central journal article supplement (PMC7771450; doi:10.1128/jcm.02338-20), 2020-12-17
Supplement: JCM.02338-20-s0001.pdf [file JCM.02338-20-s0001.pdf]

Supplemental Material  
TABLE S1**Table S1.** Study 1 (EUA) participant demographics (N=254)

| <b>Age, years</b>                                  | <b>Value</b>  |
|----------------------------------------------------|---------------|
| Mean                                               | 45.0          |
| SD                                                 | 16.6          |
| Median                                             | 43.0          |
| Min                                                | 18            |
| Max                                                | 90            |
| <b>Gender, % (n)</b>                               |               |
| Female                                             | 64.2 (163)    |
| Male                                               | 35.8 (91)     |
| <b>Race, % (n)</b>                                 |               |
| Asian                                              | 5.9 (15)      |
| Black                                              | 10.2 (26)     |
| White                                              | 56.7 (144)    |
| Other                                              | 27.2 (69)     |
| <b>Ethnicity, % (n)</b>                            |               |
| Hispanic or Latino                                 | 40.6 (103)    |
| Not Hispanic or Latino                             | 55.9 (142)    |
| Not reported                                       | 3.5 (9)       |
| <b>Symptoms, % (n)</b>                             |               |
| Cough                                              | 43.3 (110)    |
| Muscle pain                                        | 38.6 (98)     |
| Headache                                           | 37.4 (95)     |
| Sore throat                                        | 35.4 (90)     |
| Fever                                              | 30.7 (78)     |
| Shortness of breath                                | 20.5 (52)     |
| Chills                                             | 17.7 (45)     |
| New loss of taste or smell                         | 4.7 (12)      |
| Repeated shaking with chills                       | 4.3 (11)      |
| Other <sup>a</sup>                                 | 24.0 (61)     |
| <b>Collection site</b>                             |               |
| <b>All Sites<sup>b, c</sup></b>                    | 21            |
| <b>Drive through/tent</b> (% of total sites)       | 23.8 (5/21)   |
| Total specimens collected                          | 42            |
| % REF positive of total collected                  | 2.4 (1/47)    |
| <b>Outpatient clinic</b> (% of total sites)        | 52.4 (11/21)  |
| Total specimens collected                          | 74            |
| % REF positive of total collected                  | 24.3 (18/74)  |
| <b>Research clinic</b> (% of total sites)          | 19.0 (4/21)   |
| Total specimens collected                          | 72            |
| % REF positive of total collected                  | 22.5 (16/71)  |
| <b>Skilled nursing facility</b> (% of total sites) | 4.8 (1/21)    |
| Total specimens collected                          | 66            |
| % REF positive of total collected                  | 4.5 (3/66)    |
| <b>Overall positivity rate</b>                     | 15.1 (38/252) |
| <b>Mean DSO</b>                                    | 3.2           |
| <b>Median DSO</b>                                  | 3.0           |
| <b>Mode DSO</b>                                    | 2.0           |

**Abbreviations:** SD, standard deviation; MIN, minimum; Max, maximum; DSO, days from symptom onset; REF, reference test

<sup>a</sup>"Other" symptoms include gastrointestinal issues, fatigue, chest pain, rhinorrhea, and nasal congestion

<sup>b</sup>Collection sites reside in the following states: Arizona, California, Florida (7), Georgia, Iowa, Louisiana, North Carolina, Nevada (2), Ohio (3), South Carolina, Texas, Utah

<sup>c</sup>% REF positive of total collected values were calculated from specimens only with valid Lyra assay results (n=252)

TABLE S2

**Table S2.** Study 2 (Veritor vs Sofia 2 comparison) participant demographics (N=373)

|                                              | <b>Value</b>               |
|----------------------------------------------|----------------------------|
| <b>Age, years</b>                            |                            |
| Mean                                         | 45.4                       |
| SD                                           | 16.4                       |
| Median                                       | 44                         |
| Min                                          | 18                         |
| Max                                          | 98                         |
| <b>Gender, % (n)</b>                         |                            |
| Female                                       | 59.5 (222)                 |
| Male                                         | 40.5 (151)                 |
| <b>Race, % (n)</b>                           |                            |
| Asian                                        | 0.3 (1)                    |
| Black                                        | 16.1 (60)                  |
| White                                        | 69.4 (259)                 |
| Other                                        | 14.2 (53)                  |
| <b>Ethnicity, % (n)</b>                      |                            |
| Hispanic or Latino                           | 66.2 (247)                 |
| Not Hispanic or Latino                       | 33.8 (126)                 |
| <b>Symptoms, % (n)</b>                       |                            |
| Cough                                        | 56.3 (210)                 |
| Muscle pain                                  | 53.9 (201)                 |
| Headache                                     | 67.8 (253)                 |
| Sore throat                                  | 52.8 (197)                 |
| Fever                                        | 34.3 (128)                 |
| Shortness of breath                          | 13.7 (51)                  |
| Chills                                       | 37.5 (140)                 |
| New loss of taste or smell                   | 17.7 (66)                  |
| Repeated shaking w ith chills                | 1.6 (6)                    |
| Other <sup>a</sup>                           | 43.7 (163)                 |
| <b>Collection site</b>                       |                            |
| <b>All Sites</b>                             | 5                          |
| <b>Drive through/tent</b> (% of total sites) | 20.0 (1/5)                 |
| Veritor positivity rate (%)                  | 11.1 (1/9)                 |
| Sofia 2 positivity rate (%)                  | 11.1 (1/9)                 |
| <b>Outpatient clinic</b> (% of total sites)  | 20.0 (1/5)                 |
| Veritor positivity rate (%)                  | 8.2 (4/49)                 |
| Sofia 2 positivity rate (%)                  | 6.1 (3/49)                 |
| <b>Research clinic</b> (% of total sites)    | 40.0 (2/5)                 |
| Veritor positivity rate (%)                  | 12.8 (38/298)              |
| Sofia 2 positivity rate (%)                  | 11.4 (34/297) <sup>b</sup> |
| <b>Urgent care</b> (% of total sites)        | 20.0 (1/5)                 |
| Veritor positivity rate (%)                  | 0.0 (0/7)                  |
| Sofia 2 positivity rate (%)                  | 0.0 (0/7)                  |
| <b>Overall (either test) positivity rate</b> | 12.1 (44/364)              |
| <b>Mean DSO</b>                              | 3.0                        |
| <b>Median DSO</b>                            | 3.0                        |
| <b>Mode DSO</b>                              | 4.0                        |

**Abbreviations:** SD, standard deviation; MIN, minimum; Max, maximum; DSO, days from symptom onset; REF, reference test

<sup>a</sup>"Other" symptoms include shaking, gastrointestinal issues, fatigue, chest pain, rhinorrhea, and nasal congestion

<sup>b</sup>Of the 298 specimens, one was Sofia 2 invalid

TABLE S3

**Table S3.** Positive and negative predictive values for the Veritor test compared to the Lyra Assay

| 0-5 DSO          | Prevalence (%) <sup>a</sup> |                   |                   |                   |                   |                   |                   |                   |
|------------------|-----------------------------|-------------------|-------------------|-------------------|-------------------|-------------------|-------------------|-------------------|
|                  | 1.0                         | 2.0               | 5.0               | 10.0              | 15.0              | 20.0              | 25.0              | 30.0              |
| PPV (% [95% CI]) | 100 [33.2, 100]             | 100 [50.1, 100]   | 100 [72.1, 100]   | 100 [84.5, 100]   | 100 [89.7, 100]   | 100 [92.5, 100]   | 100 [94.2, 100]   | 100 [96.2, 100]   |
| NPV (% [95% CI]) | 98.8 [99.6, 99.9]           | 99.7 [99.3, 99.9] | 99.2 [98.3, 99.7] | 98.2 [96.4, 99.4] | 97.2 [94.4, 99.0] | 96.1 [92.2, 98.7] | 94.9 [89.9, 98.2] | 93.5 [86.6, 97.0] |

**Abbreviations:** DSO, days from symptom onset; PPV, positive predictive value; CI, confidence interval; NPV, negative predictive value

<sup>a</sup>Prevalence of SARS-CoV-2 among the 0-5 DSO participants

TABLE S4

**Table S4.** Agreement between Veritor and Sofia 2 (only collection involving nose blowing prior to nasal swab collection) for detection of SARS-CoV-2

|                         |                   |
|-------------------------|-------------------|
| <b>PPA</b> %, [95% CI]  | 100 (56.6, 100)   |
| <b>NPA</b> %, [95% CI]  | 98.0 (89.7, 99.7) |
| <b>OPA</b> %, [95% CI]  | 98.2 (90.6, 99.7) |
| Veritor (+)/Sofia 2(+)  | 5                 |
| Veritor (-)/Sofia 2 (+) | 0                 |
| Veritor (+)/Sofia 2 (-) | 1 <sup>a</sup>    |
| Veritor (-)/Sofia 2 (-) | 50                |

**Abbreviations:** PPA, positive percent agreement; NPA, negative percent agreement; OPA, overall percent agreement

<sup>a</sup>The 1 positive Veritor test/negative Sofia 2 test result was positive by Lyra assay discordant testing

TABLE S5

**Table S5.** Agreement between Veritor and Sofia 2 (nose blowing not included prior to nasal swab collection) for detection of SARS-CoV-2

|                         |                   |
|-------------------------|-------------------|
| <b>PPA</b> %, [95% CI]  | 97.0 (84.7, 99.5) |
| <b>NPA</b> %, [95% CI]  | 98.2 (95.8, 99.2) |
| <b>OPA</b> %, [95% CI]  | 98.0 (95.8, 99.1) |
| Veritor (+)/Sofia 2(+)  | 32                |
| Veritor (-)/Sofia 2 (+) | 1 <sup>a</sup>    |
| Veritor (+)/Sofia 2 (-) | 5 <sup>b</sup>    |
| Veritor (-)/Sofia 2 (-) | 267               |

**Abbreviations:** PPA, positive percent agreement; NPA, negative percent agreement; OPA, overall percent agreement

<sup>a</sup>The 1 negative Veritor test/positive Sofia 2 test result was positive by Lyra assay discordant testing

<sup>b</sup>Of the 5 positive Veritor test/negative Sofia 2 test results 4 were positive and 1 was negative by Lyra assay discordant testing

**FIGURE S1**

**Figure S1a.**

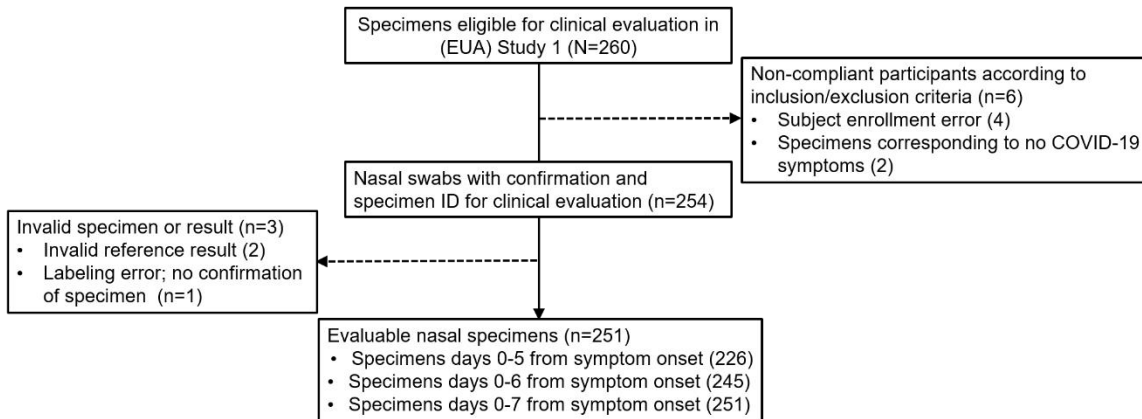

**Figure S1b.**

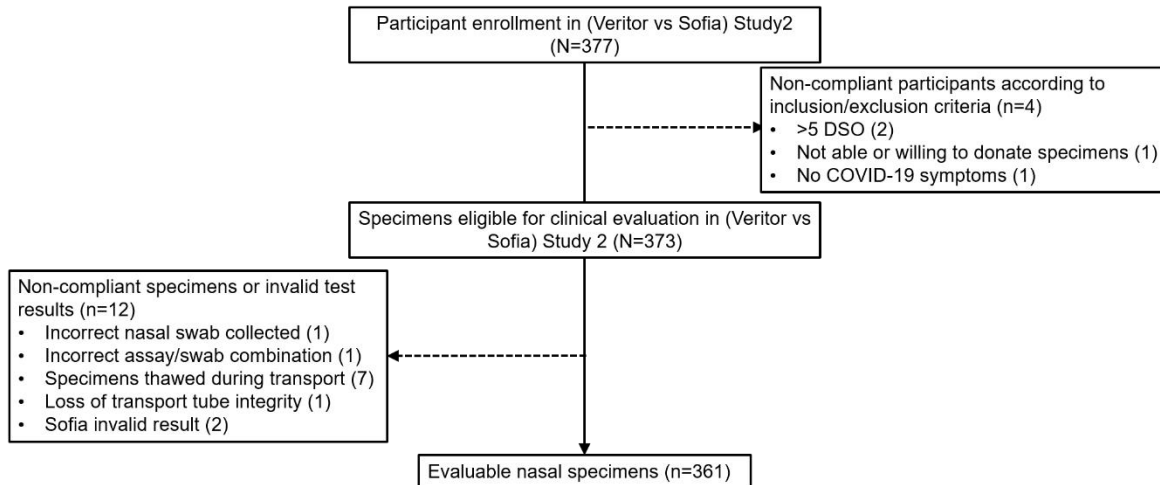

**Figure S1. (a)** Reconciliation during enrollment of swab specimens from participants,  $\geq 18$  years of age, with signs or symptoms of COVID-19 for study 1. **Abbreviations:** ID, identification; DSO, days from symptom onset **(b)** Reconciliation during enrollment of swab specimens from participants,  $\geq 18$  years of age, with signs or symptoms of COVID-19 for study 2.

**Abbreviations:** DSO, days from symptom onset

FIGURE S2

Figure S2.

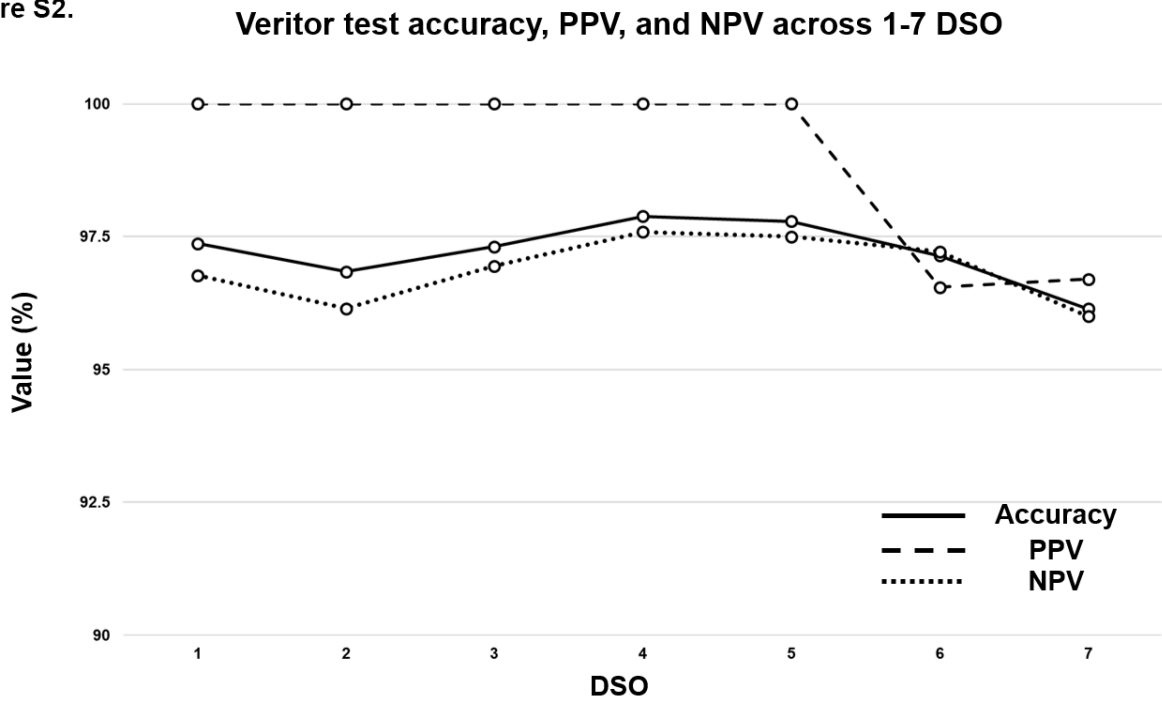

**Figure S2.** PPV, NPV, and test accuracy as a function of DSO for SARS-CoV-2 detection by the Veritor test. The point estimates for the three test values are plotted along the y-axis as percentages and the seven DSO ranges (0-1 to 0-7) reside along the x-axis. The SARS-CoV-2 prevalence value at each, respective, DSO range (based on positive reference results) was utilized for calculations and are as follows: 0-1 (21.1%), 0-2 (21.1%), 0-3 (14.8%), 0-4 (14.3%), 0-5 (13.7%), 0-6 (13.9%), and 0-7 (15.1%). Abbreviations: PPV, positive predictive value; NPV, negative predictive value; DSO, days from symptom onset.
